# Supplementary material
Source: publisher figshare collection journal article supplement (https://tandf.figshare.com/ndownloader/files/16250942)
Supplement: Supplementary file 1 [file 16250942]

## ICOP 1634684 – SUPPLEMENTARY TABLES

**Supplemental Table 1: Patient characteristics by self-reported difficulty walking a quarter mile**

|                                               | No Difficulty<br>(n = 484) | Any Difficulty<br>(n = 196) |
|-----------------------------------------------|----------------------------|-----------------------------|
| Age in Years (IQR)                            | 67 (62, 72)                | 67 (59, 71)                 |
| Male Sex (%)                                  | 341 (70)                   | 122 (62)                    |
| Current Smokers (%)                           | 180 (37)                   | 103 (53)                    |
| Age Started Smoking Regularly (IQR)*          | 17 (15, 19)                | 16 (14, 20)                 |
| Age Quitters Stopped Smoking Regularly (IQR)* | 44 (33, 55)                | 54 (44, 62)                 |
| Caucasian (%)                                 | 306 (63)                   | 132 (67)                    |
| Income < 2x Poverty (%)*                      | 197 (44)                   | 116 (64)                    |
| Insured (%)                                   | 434 (90)                   | 177 (90)                    |
| PHQ-score (IQR)                               | 1 (0, 3)                   | 3 (1, 7)                    |
| FEV1 % Predicted (IQR)                        | 82 (69, 94)                | 70 (60, 85)                 |
| BMI (IQR)                                     | 27 (24, 31)                | 29 (24, 33)                 |
| Comorbidities                                 |                            |                             |
| Obese (%)                                     | 137 (28)                   | 81 (42)                     |
| CAD (%)*                                      | 41 (9)                     | 24 (12)                     |
| CHF (%)*                                      | 24 (5)                     | 22 (11)                     |
| Anemia (%)                                    | 13 (3)                     | 12 (6)                      |
| Liver disease (%)*                            | 15 (3)                     | 9 (5)                       |
| 1 comorbidity (%)**                           | 197 (41)                   | 106 (54)                    |
| > 1 comorbidity (%)**                         | 32 (7)                     | 36 (18)                     |
| > 2 comorbidity (%)**                         | 1 (< 1)                    | 6 (3)                       |

Median (IQR) or number of subjects (%) reported for each demographic statistic. \*Indicates at least one missing observation. Median number of subjects with no difficulty walking a quarter mile was 484 (480, 484) and median number of subjects with difficulty walking a quarter mile was 196 (194, 196). \*\*In calculating the number of comorbidities for each patient, patients missing obesity, CAD, CHF, anemia, or liver disease data were assumed not to have the comorbidity in question.

**Supplemental Table 2: Patient characteristics by self-reported difficulty walking up 10 stairs**

|                                               | No Difficulty<br>(n = 542) | Any Difficulty<br>(n = 144) |
|-----------------------------------------------|----------------------------|-----------------------------|
| Age in Years (IQR)                            | 67 (62, 72)                | 65 (55, 72)                 |
| Male Sex (%)                                  | 383 (71)                   | 84 (58)                     |
| Current Smokers (%)                           | 211 (39)                   | 77 (53)                     |
| Age Started Smoking Regularly (IQR)           | 17 (15, 19)                | 16 (14, 19)                 |
| Age Quitters Stopped Smoking Regularly (IQR)* | 45 (34, 56)                | 51 (40, 61)                 |
| Caucasian (%)                                 | 350 (65)                   | 92 (64)                     |
| Income < 2x Poverty (%)*                      | 224 (45)                   | 94 (70)                     |
| Insured (%)                                   | 488 (90)                   | 128 (89)                    |
| PHQ-score (IQR)                               | 1 (0, 3)                   | 4 (1, 8)                    |
| FEV1 % Predicted (IQR)*                       | 81 (68, 93)                | 71 (58, 85)                 |
| BMI (IQR)*                                    | 27 (24, 31)                | 29 (24, 33)                 |
| Comorbidities                                 |                            |                             |
| Obese (%)*                                    | 161 (23)                   | 57 (40)                     |
| CAD (%)*                                      | 49 (9)                     | 17 (12)                     |
| CHF (%)*                                      | 30 (6)                     | 17 (12)                     |
| Anemia (%)*                                   | 21 (4)                     | 5 (4)                       |
| Liver disease (%)*                            | 17 (3)                     | 9 (6)                       |
| 1 comorbidity (%)**                           | 230 (42)                   | 75 (52)                     |
| > 1 comorbidity (%)**                         | 45 (8)                     | 25 (17)                     |
| > 2 comorbidity (%)**                         | 3 (1)                      | 5 (3)                       |

Median (IQR) or number of subjects (%) reported for each demographic statistic. \*Indicates at least one missing observation. Median number of subjects for all demographics reported here was 542 (539, 542) for subjects with no difficulty walking up 10 stairs and 144 (142, 144) for patients with any difficulty walking up 10 stairs. \*\*In calculating the number of comorbidities for each patient, patients missing obesity, CAD, CHF, anemia, or liver disease data were assumed not to have the comorbidity in question.

**Supplemental Table 3: Patient characteristics by self-reported difficulty walking between rooms**

|                                               | No Difficulty<br>(n = 720) | Any Difficulty<br>(n = 55) |
|-----------------------------------------------|----------------------------|----------------------------|
| Age in Years (IQR)                            | 67 (61, 72)                | 65 (56, 70)                |
| Male Sex (%)                                  | 493 (68)                   | 29 (53)                    |
| Current Smokers (%)                           | 303 (42)                   | 30 (55)                    |
| Age Started Smoking Regularly (IQR)           | 17 (15, 19)                | 16 (14, 20)                |
| Age Quitters Stopped Smoking Regularly (IQR)* | 45 (35, 57)                | 48 (40, 60)                |
| Caucasian (%)                                 | 458 (64)                   | 32 (58)                    |
| Income < 2x Poverty (%)*                      | 330 (50)                   | 41 (80)                    |
| Insured (%)                                   | 641 (89)                   | 51 (93)                    |
| PHQ-score (IQR)                               | 1 (0, 4)                   | 6 (3, 12)                  |
| FEV1 % Predicted (IQR)                        | 79 (65, 91)                | 70 (61, 84)                |
| BMI (IQR)*                                    | 27 (24, 31)                | 30 (24, 34)                |
| Comorbidities                                 |                            |                            |
| Obese (%)*                                    | 230 (32)                   | 26 (49)                    |
| CAD (%)*                                      | 68 (10)                    | 5 (9)                      |
| CHF (%)*                                      | 45 (6)                     | 9 (16)                     |
| Anemia (%)*                                   | 26 (4)                     | 5 (9)                      |
| Liver disease (%)*                            | 28 (4)                     | 4 (7)                      |
| 1 comorbidity (%)**                           | 321 (45)                   | 33 (60)                    |
| > 1 comorbidity (%)**                         | 70 (10)                    | 12 (22)                    |
| > 2 comorbidity (%)**                         | 6 (1)                      | 4 (7)                      |

Median (IQR) or number of subjects (%) reported for each demographic statistic. \*Indicates at least one missing observation. Median number of subjects with no difficulty walking between rooms was 720 (716, 720) and median number of subjects with difficulty walking between rooms was 55 (53, 55). \*\*In calculating the number of comorbidities for each patient, patients missing obesity, CAD, CHF, anemia, or liver disease data were assumed not to have the comorbidity in question

**Supplemental Table 4: Odds ratio estimates for depressive symptoms as predictor of self-reported difficulty with physical activity excluding patients with bronchodilator response**

|                        | Univariable Model  | Multivariable Model | Multivariable IPTW Model |
|------------------------|--------------------|---------------------|--------------------------|
| Walking a Quarter Mile | 2.85 (1.66, 4.90)  | 2.11 (1.08, 4.11)   | 2.95 (1.54, 5.62)        |
| Walking Up 10 Stairs   | 5.14 (2.96, 8.94)  | 3.47 (1.78, 6.77)   | 5.22 (2.73, 9.96)        |
| Walking Between Rooms  | 7.05 (3.74, 13.27) | 5.50 (2.51, 12.07)  | 5.94 (2.75, 12.82)       |

OR (95% CI) are provided for depressive symptoms as predictor of self-reported difficulty with three physical activities. Multivariable modeling includes PHQ-score  $\geq 10$ , gender, age, FEV1 % predicted, poverty status, smoking status, and number of comorbidities. Median number of subjects to predict self-reported difficulty walking a quarter mile, walking up 10 stairs, and walking between rooms was 597 (595, 619), 600 (598, 623), and 680 (680, 707) respectively.

**Supplemental Table 5: Odds ratio estimates for depressive symptoms as predictor of self-reported difficulty with physical activity excluding patients with missing data**

|                        | Univariable Model  | Multivariable Model | Multivariable IPTW Model |
|------------------------|--------------------|---------------------|--------------------------|
| Walking a Quarter Mile | 1.51 (0.78, 2.91)  | 1.06 (0.47, 2.39)   | 1.59 (0.73, 3.47)        |
| Walking Up 10 Stairs   | 3.08 (1.60, 5.98)  | 2.14 (0.96, 4.77)   | 3.32 (1.56, 7.07)        |
| Walking Between Rooms  | 6.26 (3.37, 11.62) | 4.92 (2.29, 10.60)  | 5.42 (2.55, 11.50)       |

*OR (95% CI) are provided for depressive symptoms as predictor of self-reported difficulty with three physical activities. Multivariable modeling includes PHQ-score  $\geq 10$ , gender, age, FEV1 % predicted, poverty status, smoking status, and number of comorbidities. Median number of subjects to predict self-reported difficulty walking a quarter mile, walking up 10 stairs, and walking between rooms was 586 (584, 610), 590 (588, 615), and 714 (713, 745) respectively.*

**Supplemental Table 6: Odds ratio estimates for depressive symptoms as predictor of self-reported difficulty with physical activity**

|                        | Multivariable Model Without Imputed Data | Imputed Multivariable Model |
|------------------------|------------------------------------------|-----------------------------|
| Walking a Quarter Mile | 2.03 (1.06, 3.88)                        | 1.77 (0.96, 3.26)           |
| Walking Up 10 Stairs   | 3.40 (1.77, 6.50)                        | 2.86 (1.54, 5.32)           |
| Walking Between Rooms  | 4.92 (2.29, 10.60)                       | 3.76 (1.81, 7.81)           |

*OR (95% CI) are provided for depressive symptoms as predictor of self-reported difficulty with three physical activities. Multivariable modeling includes PHQ-score  $\geq 10$ , gender, age, FEV1 % predicted, poverty status, smoking status, and number of comorbidities. In the multivariable model without imputed data, number of subjects to predict self-reported difficulty walking a quarter mile, walking up 10 stairs, and walking between rooms was 628, 632, and 714 respectively. In the imputed model, the number of subjects for each imputation was 680, 686, and 775 respectively.*
